# Supplementary material for: In Vivo Effects of Pichia Pastoris-Expressed Antimicrobial Peptide Hepcidin on the Community Composition and Metabolism Gut Microbiota of Rats
Source: PubMed Central journal article supplement (PMC5074506; doi:10.1371/journal.pone.0164771), 2016-10-21

## Supplementary Information

**Fig. S1** The Simpson diversity index of gut microbiota of each group on day 0 and day 90

calculated according to the 16S rRNA sequencing data.

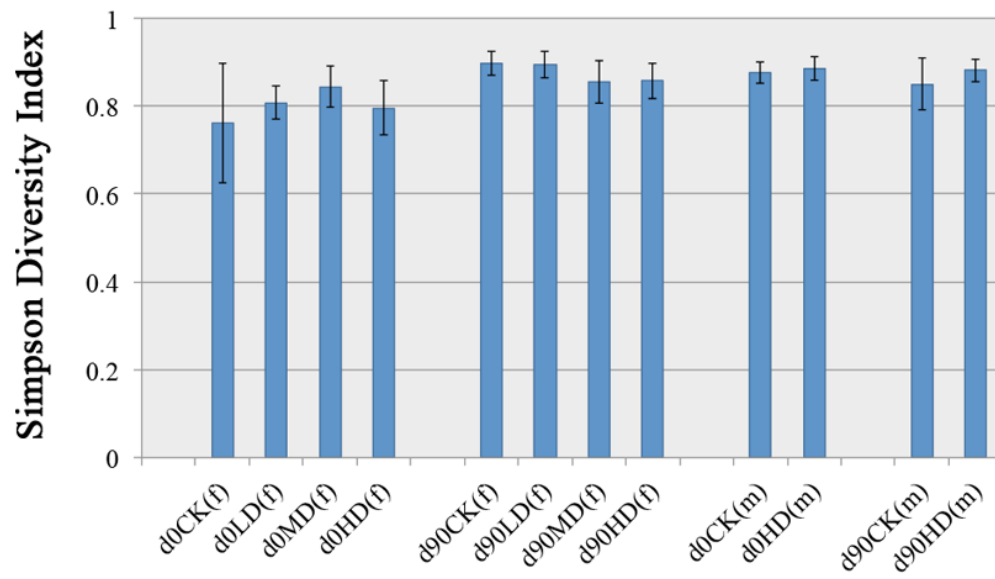

Supplement: pone.0164771.s001.pdf [file pone.0164771.s001.pdf]
