# Supplementary material for: In Vivo Effects of Pichia Pastoris-Expressed Antimicrobial Peptide Hepcidin on the Community Composition and Metabolism Gut Microbiota of Rats
Source: PubMed Central journal article supplement (PMC5074506; doi:10.1371/journal.pone.0164771), 2016-10-21

## Supplementary Information

**Fig. S3** The concentration of short-chain fatty acid (acetic acid, propionic acid and butyric acid) in the fecal samples on day 0 and day 90. The superscript \* indicates significant difference compared with CK group ( $p < 0.05$ ).

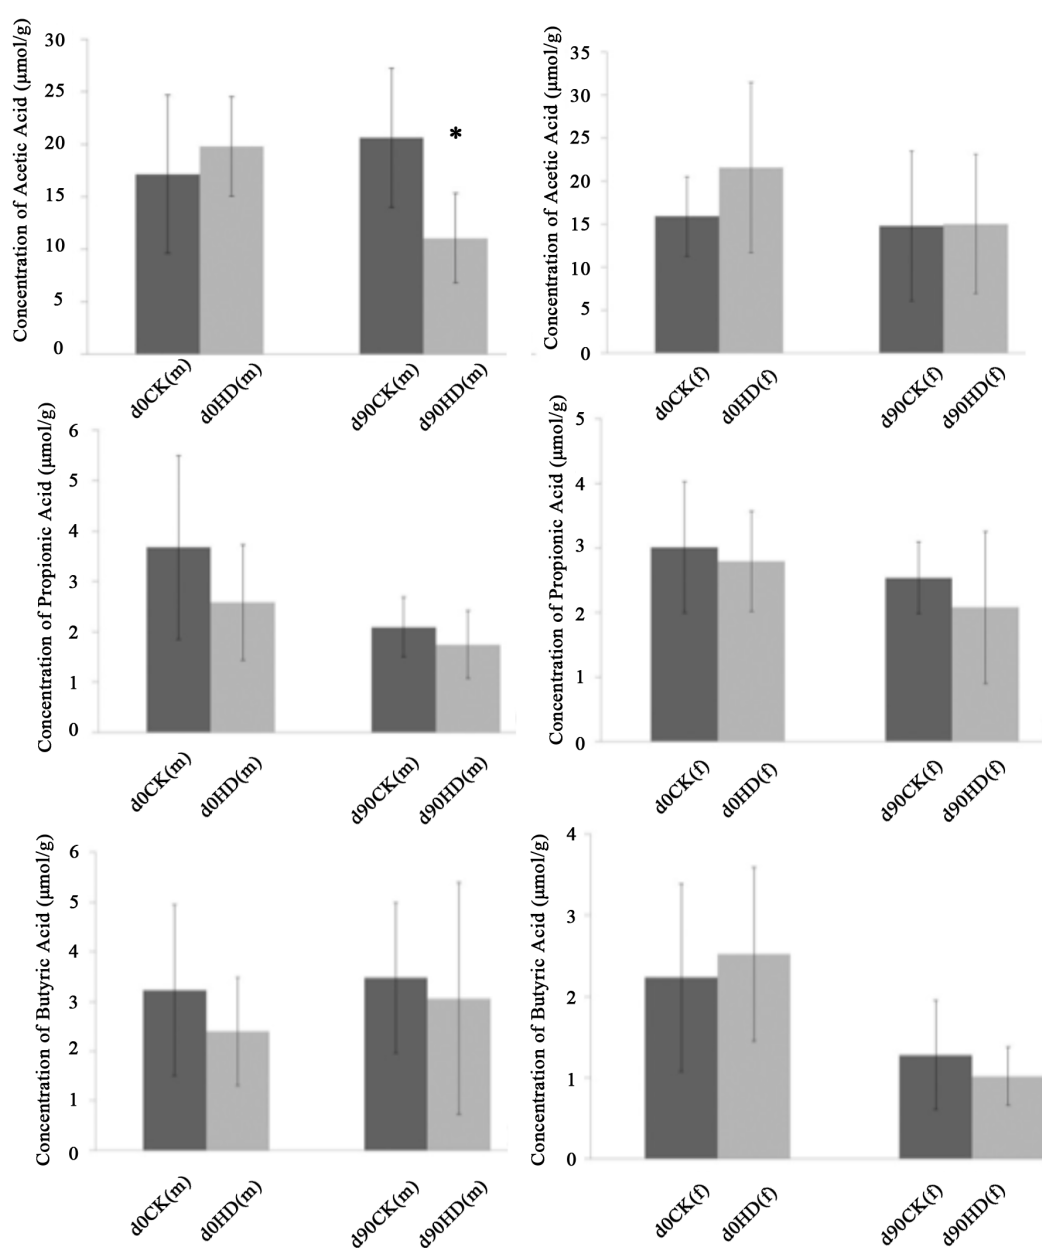

Supplement: pone.0164771.s003.pdf [file pone.0164771.s003.pdf]
