# Supplementary material for: In Vivo Effects of Pichia Pastoris-Expressed Antimicrobial Peptide Hepcidin on the Community Composition and Metabolism Gut Microbiota of Rats
Source: PubMed Central journal article supplement (PMC5074506; doi:10.1371/journal.pone.0164771), 2016-10-21

## Supplementary Information

**Fig. S5** The expression of two tight junction proteins (ZO1 and Occludin) in jejunum.

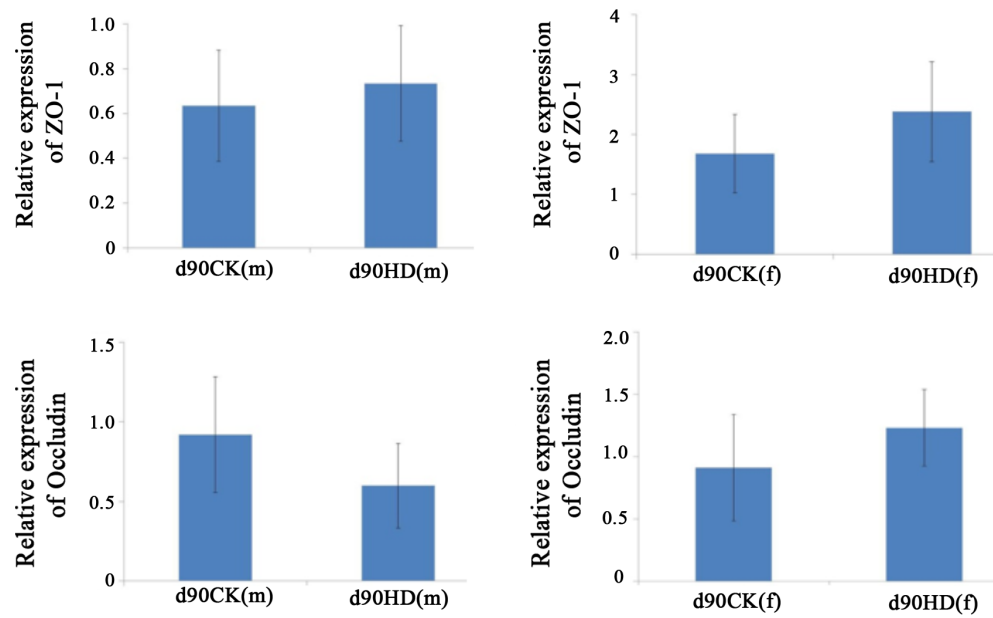

Supplement: pone.0164771.s005.pdf [file pone.0164771.s005.pdf]
